# Supplementary material for: Image-based methods for phenotyping growth dynamics and fitness components in Arabidopsis thaliana
Source: PubMed Central journal article supplement (PMC6060534; doi:10.1186/s13007-018-0331-6), 2018-07-26

**Figure S1.**

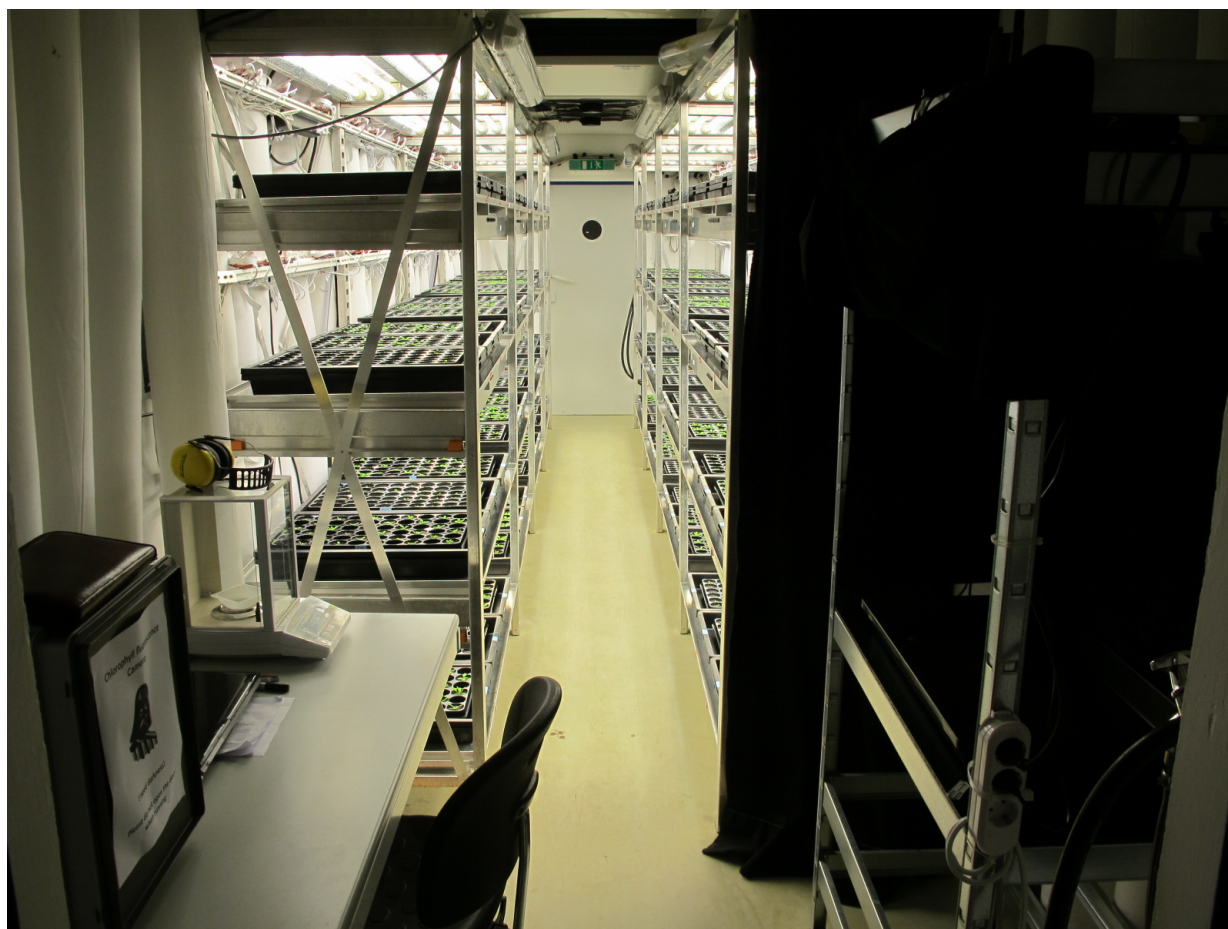

Figure S2.

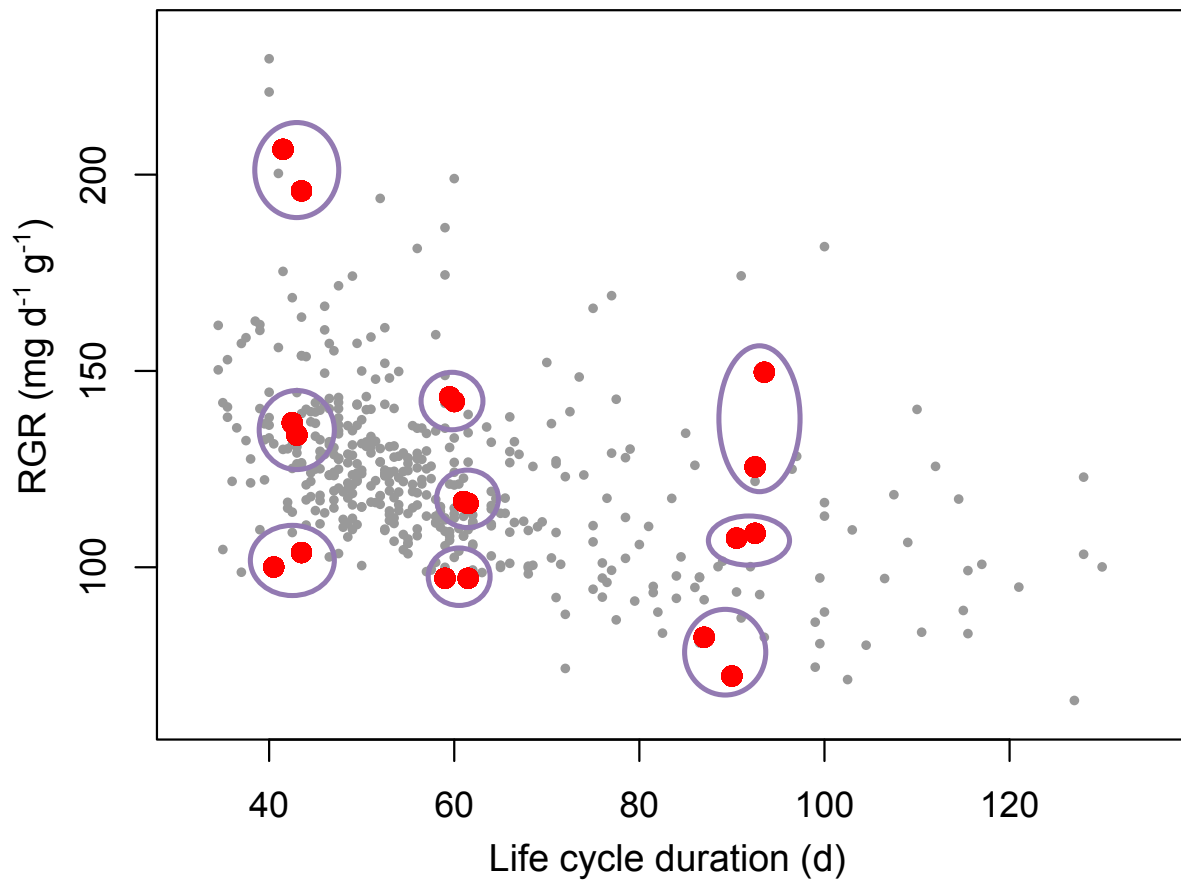

**Figure S3.**

**a**

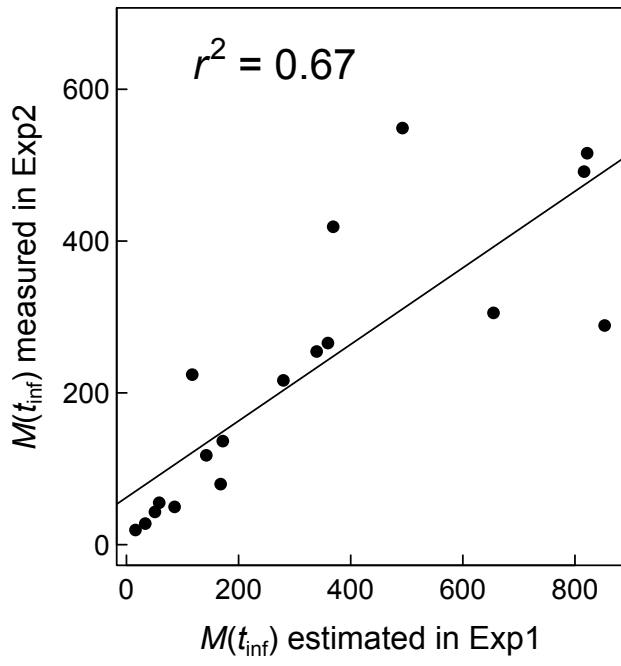

**b**

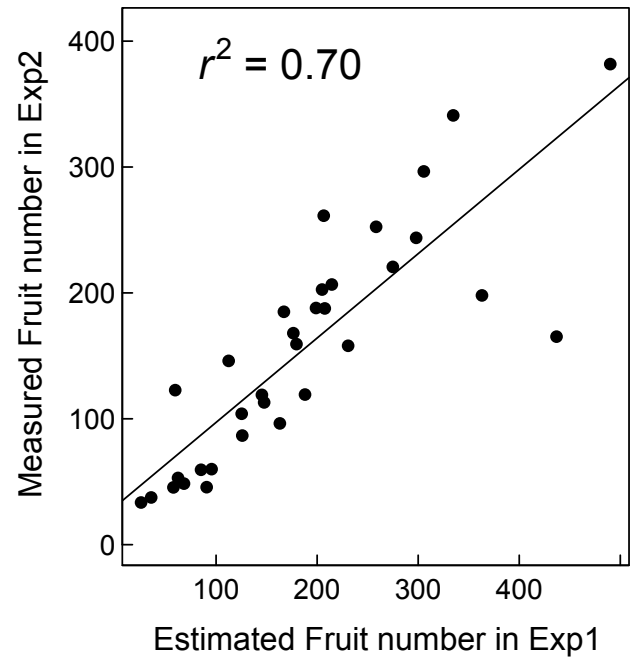

Supplement: 13007_2018_331_MOESM6_ESM.pdf [file 13007_2018_331_MOESM6_ESM.pdf]
